# Supplementary material for: SIV-specific neutralizing antibody induction following selection of a PI3K drive-attenuated nef variant
Source: eLife journal article supplement (doi:10.7554/elife.88849), 2023-08-08
Supplement: fig4-data1 [file elife-88849-fig4-data1-v1.zip]

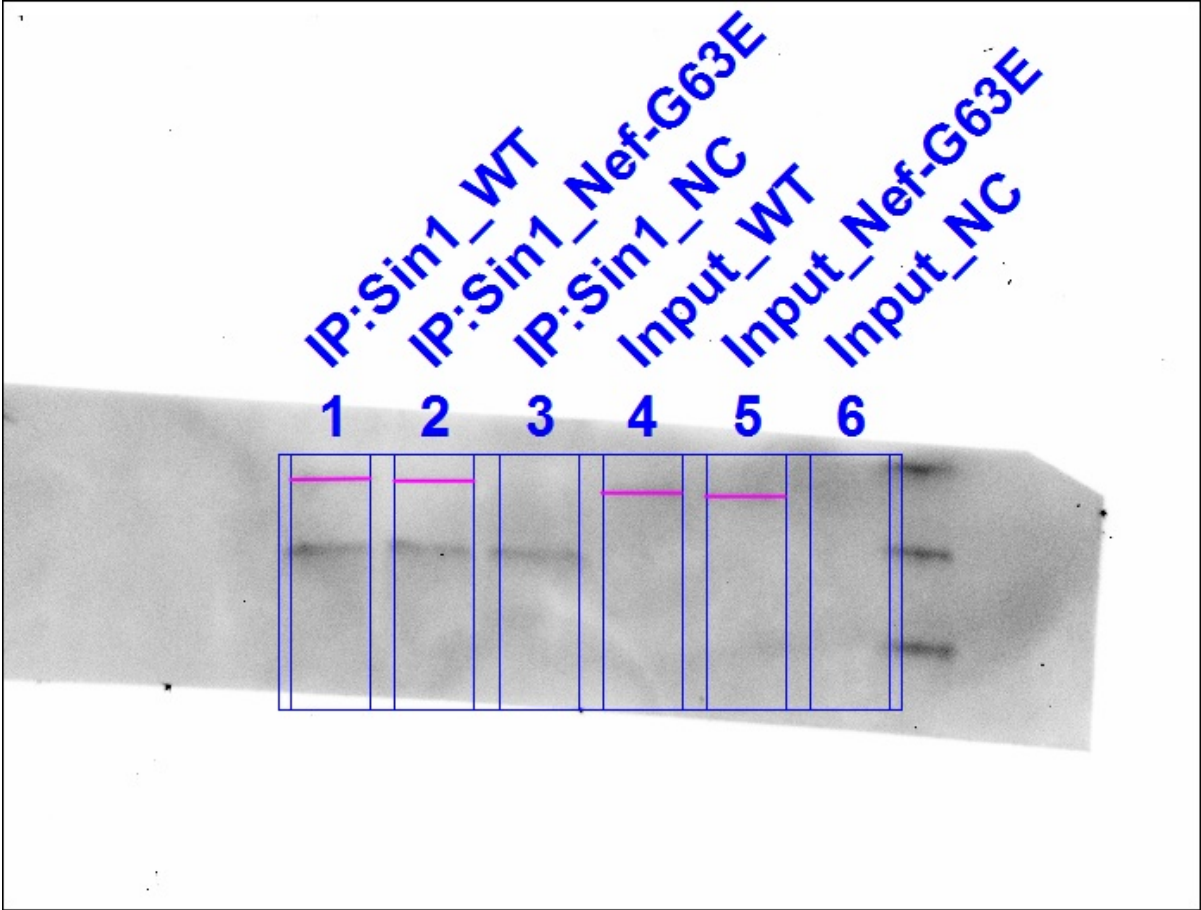

C:/Users/Ken/Desktop/sin/2024-05-21 22hr 26min-MK3.scn

Acquisition Information

|                     |                  |
|---------------------|------------------|
| Imager              | ChemiDoc™ XRS+   |
| Exposure Time (sec) | 180.000 (Manual) |
| Flat Field          | Applied (Lens)   |
| Serial Number       | 721BR04915       |
| Software Version    | 3.0              |
| Application         | Chemi            |
| Excitation Source   | No Illumination  |
| Emission Filter     | No Filter        |
| Binning             | 2x2              |

Image Information

|                  |                       |
|------------------|-----------------------|
| Acquisition Date | 5/21/2024 10:29:23 PM |
| User Name        | Ken                   |
| Image Area (mm)  | X: 90.0 Y: 67.2       |
| Image Pixels     | X: 696 Y: 520         |
| Pixel Size (um)  | X: 129.3 Y: 129.3     |
| Data Range (Int) | 0 - 45380             |

Analysis Settings

|           |                                                                                                                                                                      |
|-----------|----------------------------------------------------------------------------------------------------------------------------------------------------------------------|
| Detection | <div>Lane detection:<br/>Manually created lanes</div> <div>Band detection:<br/>Automatically detected bands with sensitivity: High<br/>Manually adjusted bands</div> |
|-----------|----------------------------------------------------------------------------------------------------------------------------------------------------------------------|

Lane Background Subtraction:  
Lane background subtracted with disk size: 10

## Lane And Band Analysis

### Lane 1 - IP:Sin1\_WT

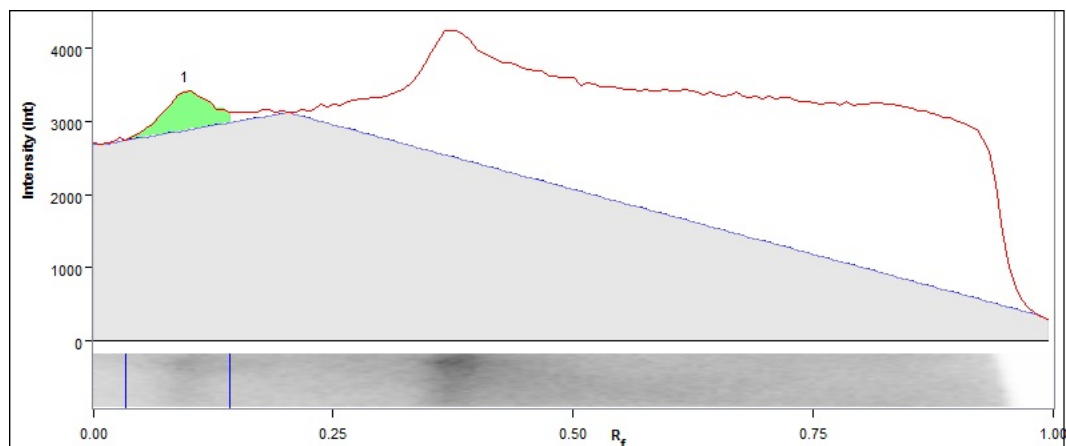

| Band No. | Band Label | Mol. Wt. (KDa) | Relative Front | Volume (Int) | Abs. Quant. | Rel. Quant. | Band % | Lane % |
|----------|------------|----------------|----------------|--------------|-------------|-------------|--------|--------|
| 1        |            | N/A            | 0.101          | 212,934      | N/A         | N/A         | 100.0  | 2.5    |

|                 |                                                     |
|-----------------|-----------------------------------------------------|
| Band Detection  | Automatically detected bands with sensitivity: High |
| Lane Background | Lane background subtracted with disk size: 10       |

### Lane 2 - IP:Sin1\_Nef-G63E

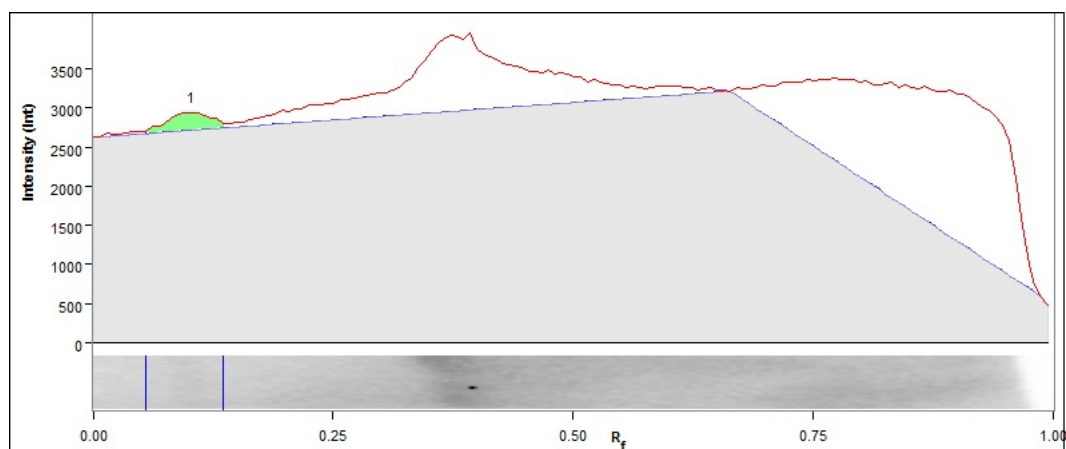

| Band No. | Band Label | Mol. Wt. (KDa) | Relative Front | Volume (Int) | Abs. Quant. | Rel. Quant. | Band % | Lane % |
|----------|------------|----------------|----------------|--------------|-------------|-------------|--------|--------|
| 1        |            | N/A            | 0.108          | 84,410       | N/A         | N/A         | 100.0  | 2.2    |

|                 |                                                     |
|-----------------|-----------------------------------------------------|
| Band Detection  | Automatically detected bands with sensitivity: High |
| Lane Background | Lane background subtracted with disk size: 10       |

### Lane 3 - IP:Sin1\_NC

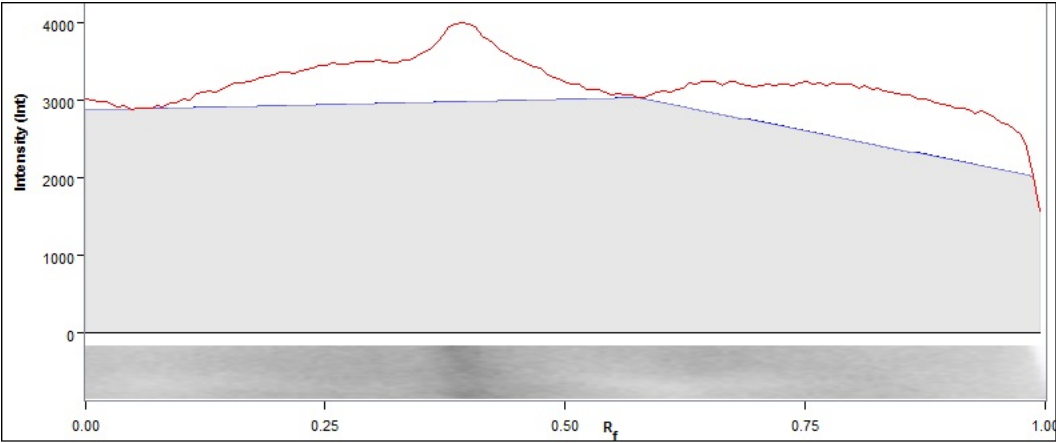

| Band No. | Band Label | Mol. Wt. (KDa) | Relative Front | Volume (Int) | Abs. Quant. | Rel. Quant. | Band % | Lane % |
|----------|------------|----------------|----------------|--------------|-------------|-------------|--------|--------|
|          |            |                |                |              |             |             |        |        |

|                 |                                                     |
|-----------------|-----------------------------------------------------|
| Band Detection  | Automatically detected bands with sensitivity: High |
| Lane Background | Lane background subtracted with disk size: 10       |

Lane 4 - Input\_WT

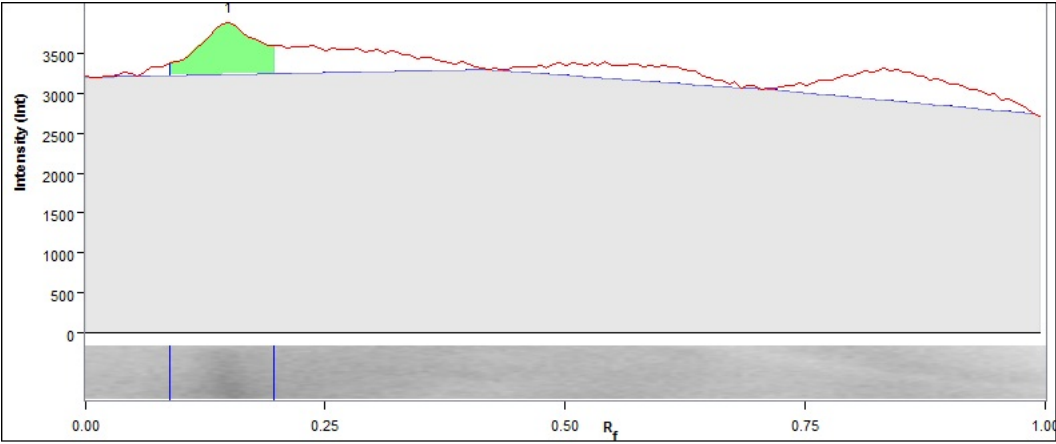

| Band No. | Band Label | Mol. Wt. (KDa) | Relative Front | Volume (Int) | Abs. Quant. | Rel. Quant. | Band % | Lane % |
|----------|------------|----------------|----------------|--------------|-------------|-------------|--------|--------|
| 1        |            | N/A            | 0.155          | 318,504      | N/A         | N/A         | 100.0  | 23.6   |

|                 |                                                     |
|-----------------|-----------------------------------------------------|
| Band Detection  | Automatically detected bands with sensitivity: High |
| Lane Background | Lane background subtracted with disk size: 10       |

Lane 5 - Input\_Nef-G63E

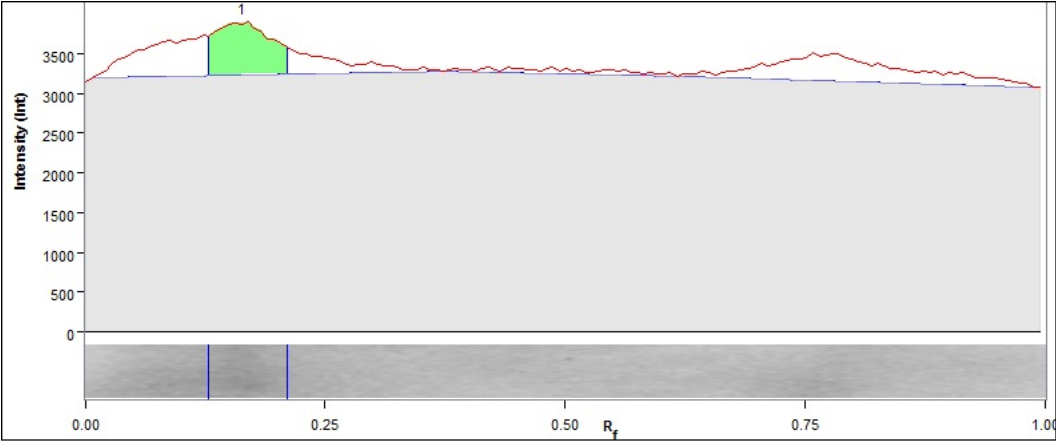

| Band No. | Band Label | Mol. Wt. (KDa) | Relative Front | Volume (Int) | Abs. Quant. | Rel. Quant. | Band % | Lane % |
|----------|------------|----------------|----------------|--------------|-------------|-------------|--------|--------|
| 1        |            | N/A            | 0.169          | 339,434      | N/A         | N/A         | 100.0  | 28.3   |

|                 |                                                     |
|-----------------|-----------------------------------------------------|
| Band Detection  | Automatically detected bands with sensitivity: High |
| Lane Background | Lane background subtracted with disk size: 10       |

Lane 6 - Input\_NC

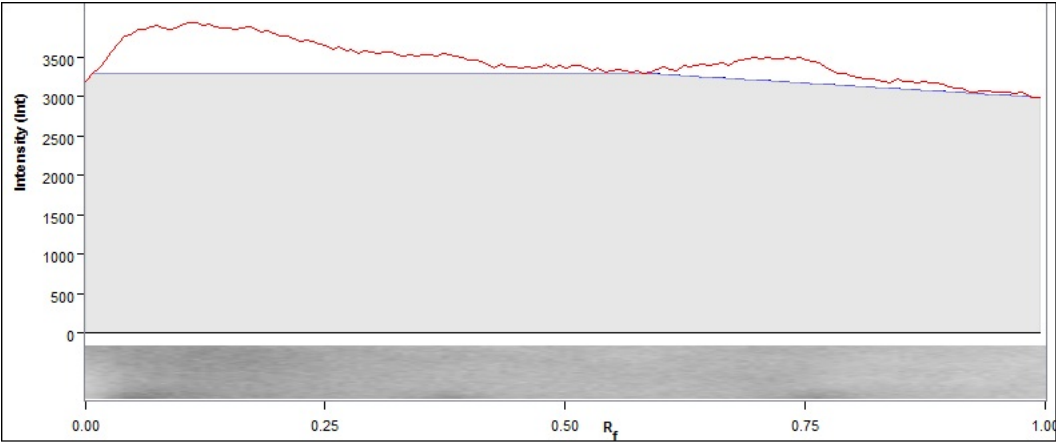

| Band No. | Band Label | Mol. Wt. (KDa) | Relative Front | Volume (Int) | Abs. Quant. | Rel. Quant. | Band % | Lane % |
|----------|------------|----------------|----------------|--------------|-------------|-------------|--------|--------|
|          |            |                |                |              |             |             |        |        |

|                 |                                                     |
|-----------------|-----------------------------------------------------|
| Band Detection  | Automatically detected bands with sensitivity: High |
| Lane Background | Lane background subtracted with disk size: 10       |
