# Supplementary material for: SIV-specific neutralizing antibody induction following selection of a PI3K drive-attenuated nef variant
Source: eLife. 2025 Mar 3;12:RP88849. doi: 10.7554/eLife.88849 (PMC11875539; doi:10.7554/eLife.88849)
Supplement: Figure 1—figure supplement 1—source data 1. [file elife-88849-fig1-figsupp1-data1.xlsx]

## Sheet: Table S1
				NAb non-inducer cohort (n = 19)
		SIVmac239 neutralization at 1:2 plasma dilution by 10TCID50 killing assay (wks p.i.)									pVL	Nef G63E	Detected Mamu
	MHC-I/ ID	wk11-20	wk21-30	wk31-40	wk41-50	wk51-60	wk61-70	wk71-80	wk81-90	wk91-104	at 6 mo	at 1 yr	alleles
	A+
	R06-037		wk25 -		wk46 +/-			wk72 -	wk87 -	wk95 -	6.4 x 102	- (pVL < 400)
	R07-001		wk25 -		wk42 -				wk88 +/-	wk96 -	< 400	- (pVL < 400)	A1*032:02
	R07-004		wk25 -		wk46 -		wk64 -	wk74 -	wk86 -		4.5 x 103	+	B*039:01
	R07-009		wk25 -		wk46 -		wk64 -	wk74 -			4.5 x 103	-
	B+
	R06-001		wk25 -		wk48 -	wk60 -		wk80 -	wk90 -		8.2 x 103	-
	R06-039		wk25 -		wk46 -	wk56 -					8.5 x 106	-	A1*032:02, B*004:01
	E+
	R01-011		wk22 -	wk40 -		wk52 -		wk71 -	wk85 -	wk104 -	1.3 x 105	-	B*004:01
	R05-007		wk26 -			wk55 +/-		wk71 -	wk89 -	wk97 -	1.6 x 104	-
	R08-007		wk21 -		wk46 -		wk69 -		wk82 +/-		8.5 x 106	-
	R09-011	wk18 -		wk36 -		wk52 -					8.5 x 106	-
	R06-038		wk25 -			wk58 +/-		wk80 +/-		wk95 -	1.1 x 105	-
	J+
	R04-014	wk12 -	wk25 -	wk40 -							1.5 x 105	+ (wk40)	B*039:01
	R06-022	wk12 -	wk23 -								1.4 x 107	- (wk23)	B*039:01
	R10-001	wk14 -	wk30 -	wk37 -							1.9 x 107	- (wk37)	B*039:01
	D+
	R05-006		wk25 -		wk48 -			wk80 -	wk90 -	wk98 -	5.4 x 102	-	A1*032:02, B*004:01
	R06-034		wk25 -		wk42 -		wk61 -	wk80 +/-	wk88 +/-	wk96 -	4.5 x 103	-	A1*032:02, B*004:01
	R08-005		wk25 -		wk48 -		wk68 -			wk100 -	9.0 x 102	-	A1*032:02, B*004:01
	Others
	R10-002	wk14 -				wk59 -				wk104 -	5.7 x 105	-
	R10-006	wk14 -	wk30 -			wk55 -					1.0 x 106	-
