# Supplementary material for: SIV-specific neutralizing antibody induction following selection of a PI3K drive-attenuated nef variant
Source: eLife. 2025 Mar 3;12:RP88849. doi: 10.7554/eLife.88849 (PMC11875539; doi:10.7554/eLife.88849)
Supplement: Figure 1—figure supplement 2—source data 1. [file elife-88849-fig1-figsupp2-data1.xlsx]

## Sheet: Sheet1
	Group	Rhesus ID	mg/ml	Collected/pooled			10 TCID50 SIVmac239
			(IgG)	(wks post-challenge)			100% killing titer
	NAb (+)	R06-032	30	wk 76			1:16
		R01-012	30	wk 73-87			1:32
		R03-015	30	wk 112			1:8
		R02-004	30	wk 76			1:4
		R01-010	30	wk 77			1:16
		R06-019	30	wk 85			1:4
		R-360	30	wk 60-86			1:4
		R02-007	30	wk 42-70			1:32
		R05-010	30	wk 71			1:64
	NAb (-)	R01-011	42	wk 104			< 1:2
	uninfected	pooled	36	-			< 1:2
