# Supplementary figures and images for: SIV-specific neutralizing antibody induction following selection of a PI3K drive-attenuated nef variant
Source: eLife journal article supplement (doi:10.7554/elife.88849), 2023-08-08

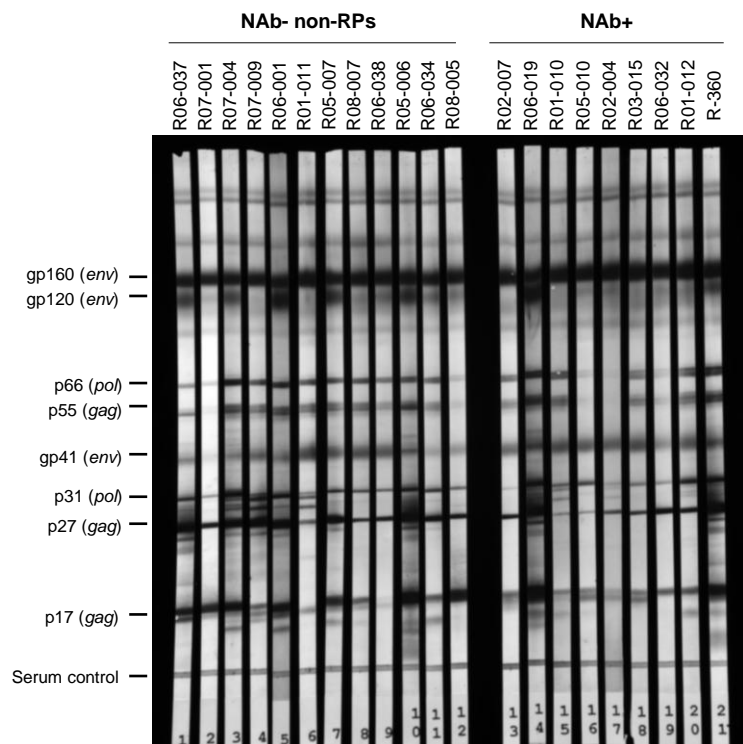

Supplement: fig1-figsupp3-data1 [file Original western blots for Figure 1—figure supplement 3^J labeling the corresponding viral protein bands and IDs.pdf › Figure 1—figure supplement 3 source data 1. PDF file containing original western blots for Figure 1—figure supplement 3, labeling the corresponding viral protein bands and IDs/Original western blots for Figure 1—figure supplement 3^J labeling the corresponding viral protein bands and IDs.pdf]
